# Supplementary material for: Electrodeposited spinel NiCo2O4 nanosheet arrays for glucose sensing application
Source: Royal Society of Chemistry journal article supplement (doi:10.1039/c5ra13833g), 2015-01-01
Supplement: c5ra13833g1.pdf [file c5ra13833g1.pdf]

## Supplementary Information

# Electrodeposited Spinel $\text{NiCo}_2\text{O}_4$ Nanosheet Arrays for Glucose Sensing Application

Kusha Kumar Naik, Suresh Kumar, Chandra Sekhar Rout \*

*School of Basic Sciences, Indian Institute of Technology, Bhubaneswar751013, Odisha*

*India*

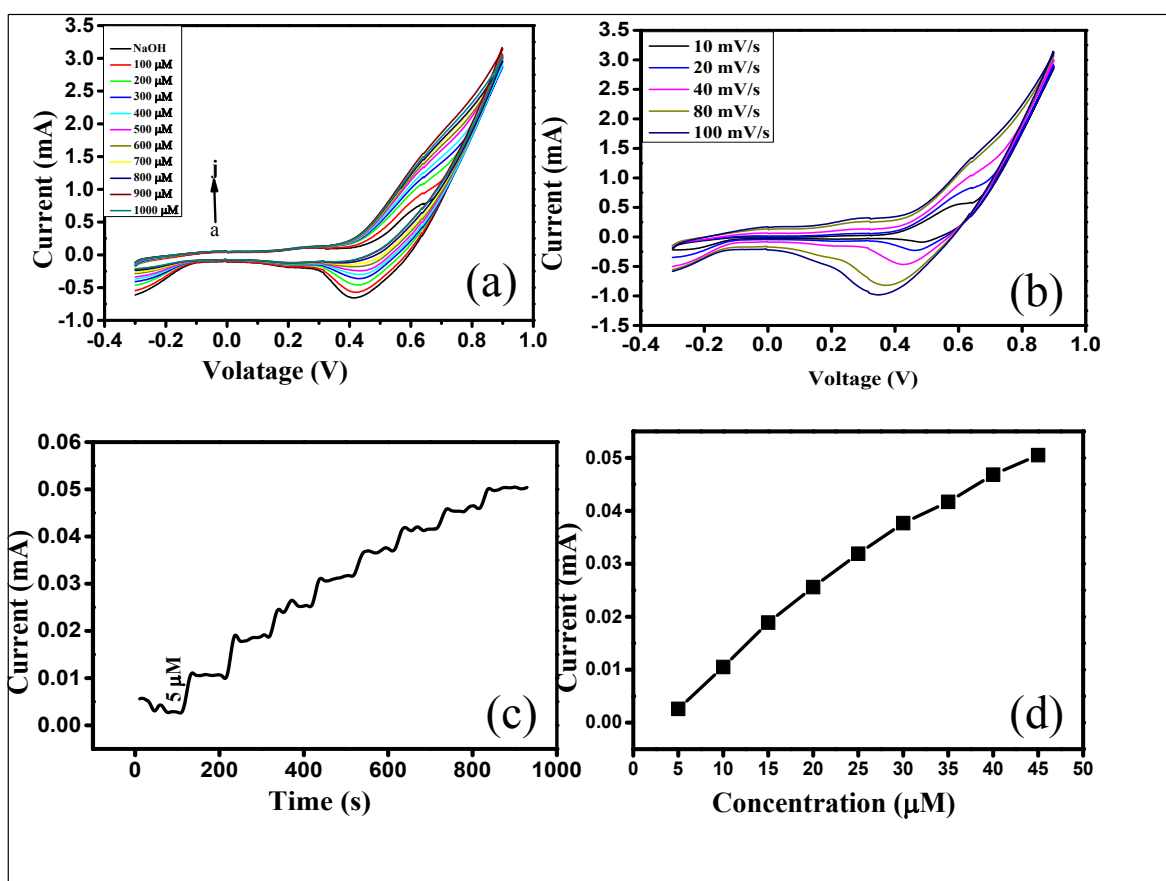

Fig. S1. (a) CVs of Cobalt Oxide electrode at different glucose concentrations: black colour solid line shows the CV without glucose and in (a) 100  $\mu\text{M}$  to (j) 1000  $\mu\text{M}$  glucose in 0.1 M of NaOH, (b) CVs in presence of 100  $\mu\text{M}$  glucose at different scan rate, (c) Current versus time measurement at 0.4 V with successive addition of 5  $\mu\text{M}$  of glucose in 100 s time interval. (d) dependence on current with respect to the glucose concentration.

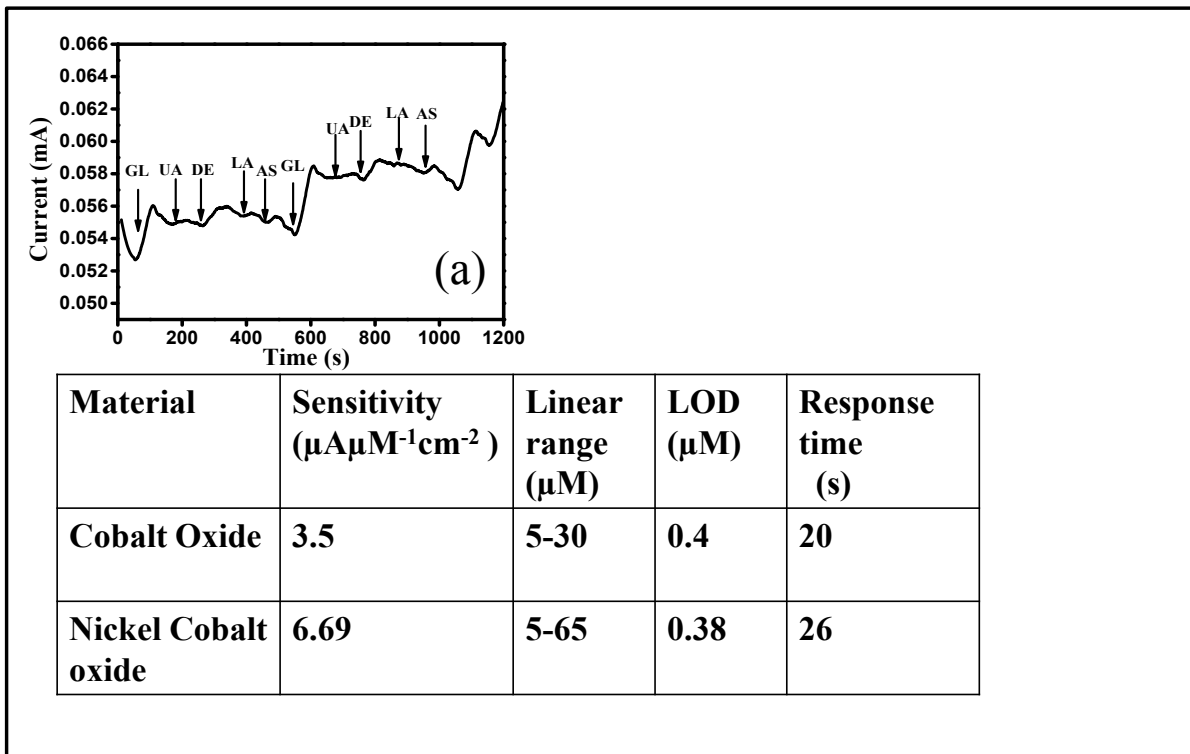

Fig. S2. (a) Interference study of Cobalt oxide at 0.4 V. Comparison data between Cobalt oxide and Nickel cobalt oxide.

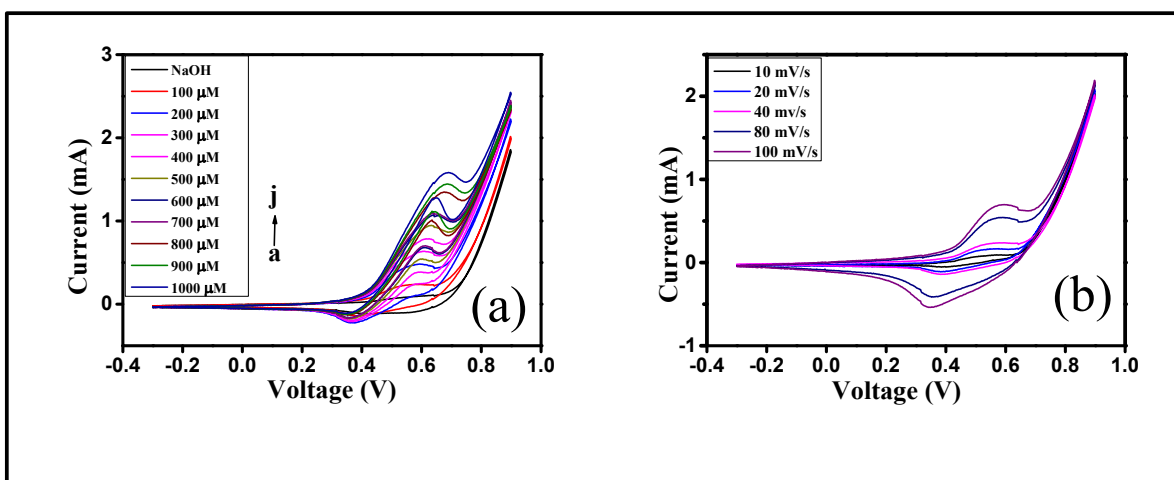

Fig. S3. (a) CVs of Nickel Oxide electrode at different glucose concentrations: black colour solid line shows the CV without glucose and in (a) 100  $\mu\text{M}$  to (j) 1000  $\mu\text{M}$  glucose in 0.1 M of NaOH, (b) CVs in presence of 100  $\mu\text{M}$  glucose at different scan rate.

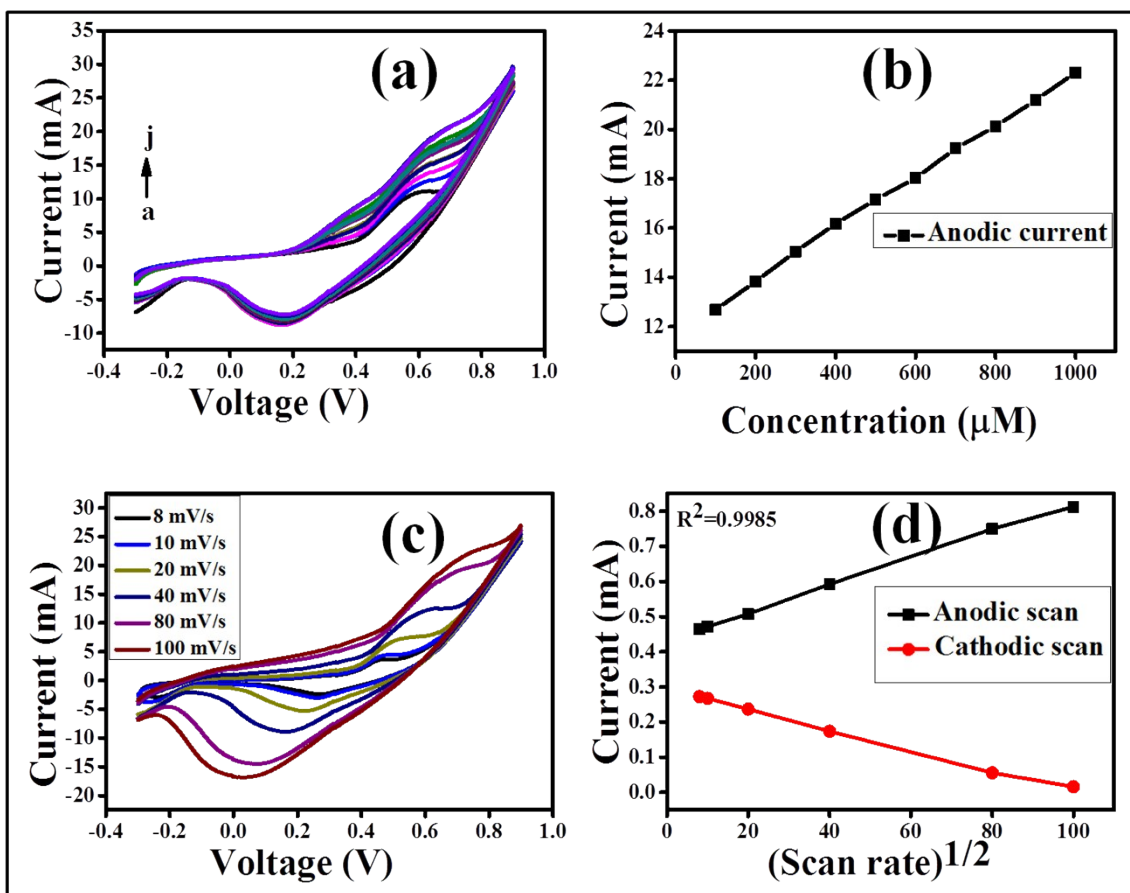

Fig. S4. (a) CVs of Nickel Cobalt Oxide on Ni foam at different glucose concentrations: black colour solid line shows the CV without glucose and in (a) 100  $\mu\text{M}$  to (j) 1000  $\mu\text{M}$  glucose in 0.1 M of NaOH, (b) Current vs Concentration graph, (c) CVs in presence of 100  $\mu\text{M}$  glucose at different scan rate and (d) Current vs (scan rate)<sup>1/2</sup> graph.

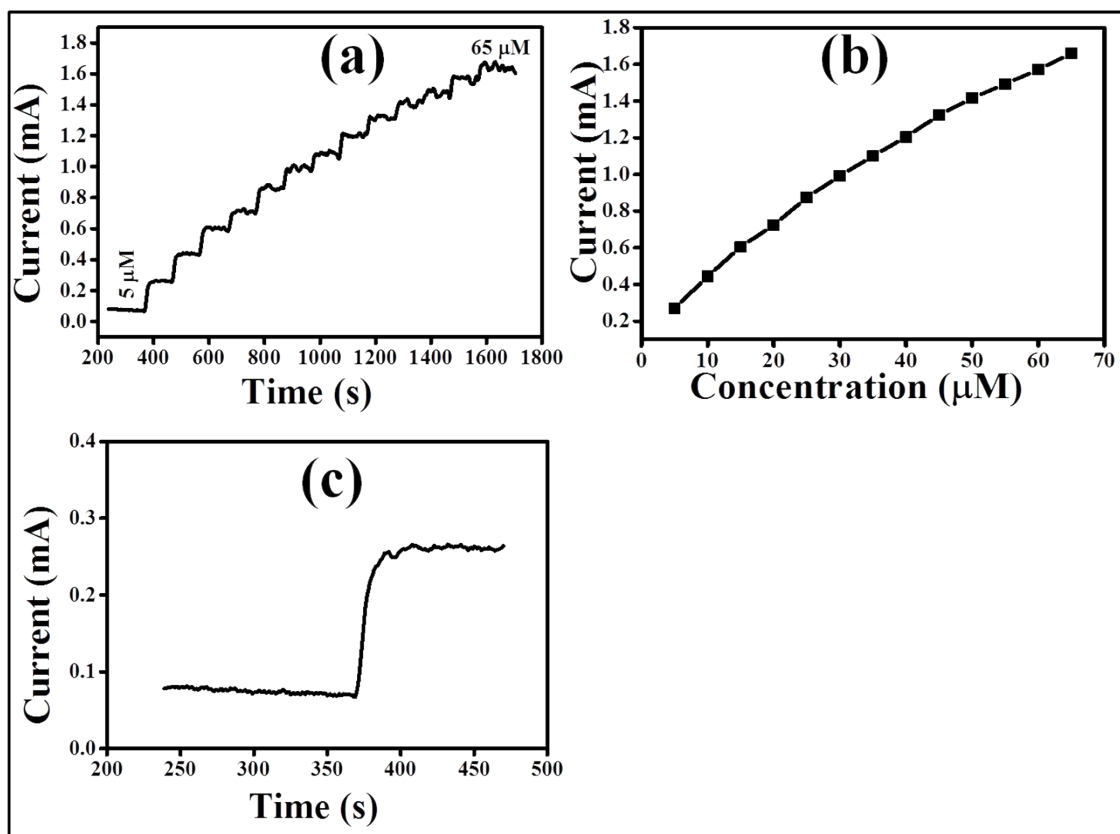

Fig. S5. (a) CA study of Nickel Cobalt oxide on Ni foam at 0.4 V, (b) Calibration graph and (c) response time.

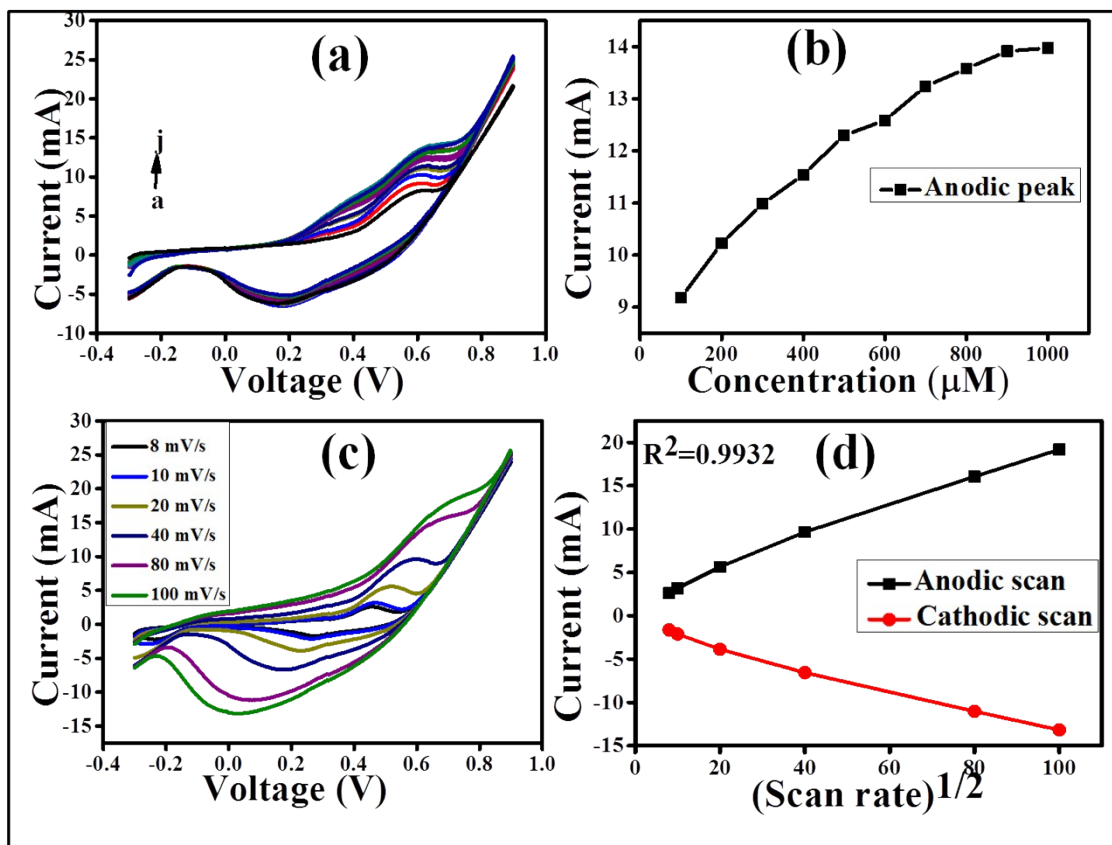

Fig. S6. (a) CVs of Nickel Cobalt Oxide on Ni strip at different glucose concentrations: black colour solid line shows the CV without glucose and in (a) 100  $\mu\text{M}$  to (j) 1000  $\mu\text{M}$  glucose in 0.1 M of NaOH, (b) Current vs Concentration graph, (c) CVs in presence of 100  $\mu\text{M}$  glucose at different scan rate and (d) Current vs (scan rate)<sup>1/2</sup> graph.

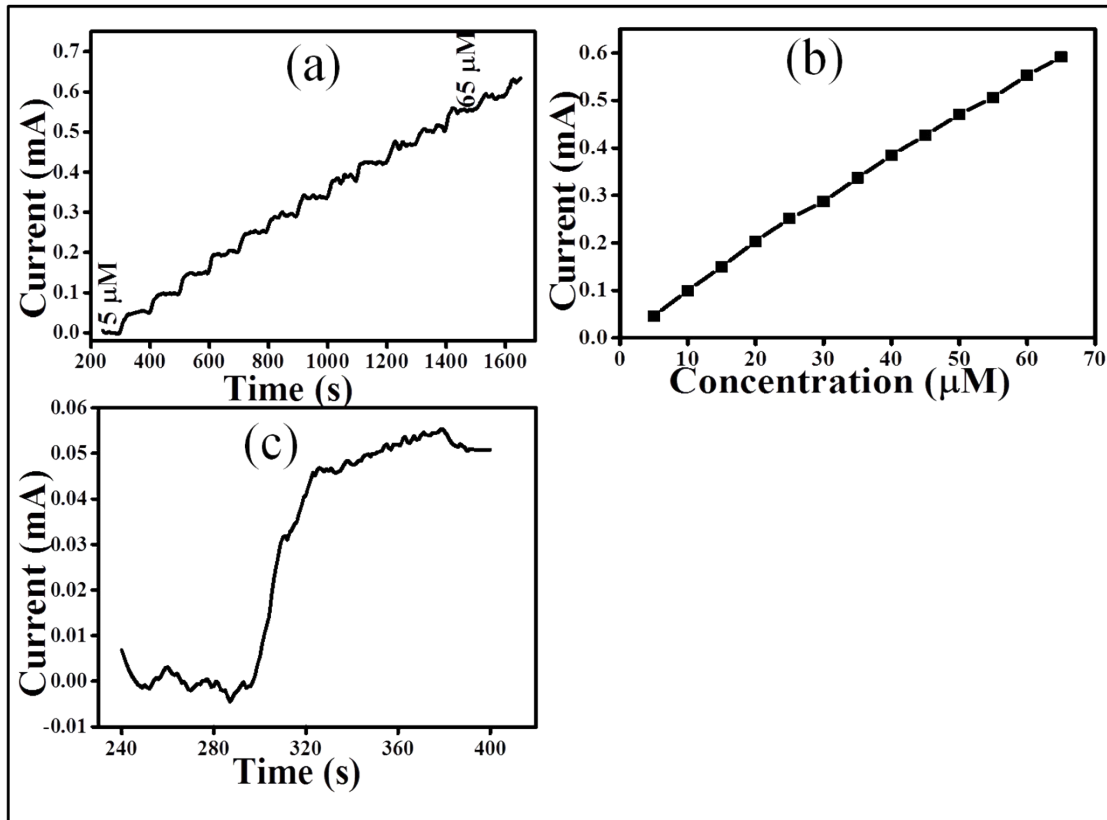

Fig. S7. (a) CA study of Nickel Cobalt oxide on Ni strip at 0.4 V, (b) Calibration graph and (c) response time.
